# Supplementary material
Source: MDPI journal article supplement (https://www.mdpi.com/1424-2818/14/5/338)
Supplement: s1 [file s1]

Archive with 7 entries (6 files):
- diversity-1668972-supplementary/
- diversity-1668972-supplementary/S1_Information sheet_Delphi rounds 1_2_Diversity.pdf
- diversity-1668972-supplementary/S2_Assessing_welfare_and_survival_in_stranded_cetaceans-_Round_one_Diversity.pdf
- diversity-1668972-supplementary/S3_Categories of welfare_Q1_Concepts, knowledge gaps, concerns_Diversity.pdf
- diversity-1668972-supplementary/S4_Categories of survival_Q1_Concepts, knowledge gaps, concerns_Diversity.pdf
- diversity-1668972-supplementary/S5_Assessing_welfare_and_survival_in_stranded_cetaceans-_Round_two_Diversity.pdf
- diversity-1668972-supplementary/S6_Linear Discriminant Analysis_Concepts, knowledge gaps, concerns_Diversity.pdf
